# Supplementary material for: LEAFY is a pioneer transcription factor and licenses cell reprogramming to floral fate
Source: PubMed Central journal article supplement (PMC7840934; doi:10.1038/s41467-020-20883-w), 2021-01-27
Supplement: 41467_2020_20883_MOESM6_ESM.pdf [file 41467_2020_20883_MOESM6_ESM.pdf]

## Reporting Summary

Nature Research wishes to improve the reproducibility of the work that we publish. This form provides structure for consistency and transparency in reporting. For further information on Nature Research policies, see [Authors & Referees](#) and the [Editorial Policy Checklist](#).

### Statistics

For all statistical analyses, confirm that the following items are present in the figure legend, table legend, main text, or Methods section.

- |                                     |                                                                                                                                                                                                                                                                                                |
|-------------------------------------|------------------------------------------------------------------------------------------------------------------------------------------------------------------------------------------------------------------------------------------------------------------------------------------------|
| n/a                                 | Confirmed                                                                                                                                                                                                                                                                                      |
| <input type="checkbox"/>            | <input checked="" type="checkbox"/> The exact sample size ( <i>n</i> ) for each experimental group/condition, given as a discrete number and unit of measurement                                                                                                                               |
| <input type="checkbox"/>            | <input checked="" type="checkbox"/> A statement on whether measurements were taken from distinct samples or whether the same sample was measured repeatedly                                                                                                                                    |
| <input type="checkbox"/>            | <input checked="" type="checkbox"/> The statistical test(s) used AND whether they are one- or two-sided<br><i>Only common tests should be described solely by name; describe more complex techniques in the Methods section.</i>                                                               |
| <input checked="" type="checkbox"/> | <input type="checkbox"/> A description of all covariates tested                                                                                                                                                                                                                                |
| <input type="checkbox"/>            | <input checked="" type="checkbox"/> A description of any assumptions or corrections, such as tests of normality and adjustment for multiple comparisons                                                                                                                                        |
| <input type="checkbox"/>            | <input checked="" type="checkbox"/> A full description of the statistical parameters including central tendency (e.g. means) or other basic estimates (e.g. regression coefficient) AND variation (e.g. standard deviation) or associated estimates of uncertainty (e.g. confidence intervals) |
| <input type="checkbox"/>            | <input checked="" type="checkbox"/> For null hypothesis testing, the test statistic (e.g. <i>F</i> , <i>t</i> , <i>r</i> ) with confidence intervals, effect sizes, degrees of freedom and <i>P</i> value noted<br><i>Give P values as exact values whenever suitable.</i>                     |
| <input checked="" type="checkbox"/> | <input type="checkbox"/> For Bayesian analysis, information on the choice of priors and Markov chain Monte Carlo settings                                                                                                                                                                      |
| <input checked="" type="checkbox"/> | <input type="checkbox"/> For hierarchical and complex designs, identification of the appropriate level for tests and full reporting of outcomes                                                                                                                                                |
| <input type="checkbox"/>            | <input checked="" type="checkbox"/> Estimates of effect sizes (e.g. Cohen's <i>d</i> , Pearson's <i>r</i> ), indicating how they were calculated                                                                                                                                               |

*Our web collection on [statistics for biologists](#) contains articles on many of the points above.*

### Software and code

Policy information about [availability of computer code](#)

|                 |                                                                                                                                                                                                                                                                                                                                                                                                                           |
|-----------------|---------------------------------------------------------------------------------------------------------------------------------------------------------------------------------------------------------------------------------------------------------------------------------------------------------------------------------------------------------------------------------------------------------------------------|
| Data collection | NA                                                                                                                                                                                                                                                                                                                                                                                                                        |
| Data analysis   | Software used:<br>FASTQC (v0.11.5)<br>Timmmomatic (v0.32)<br>Bowtie2 (v2.3.1)<br>Bowtie (v1.2.2)<br>Samtools (v1.7)<br>MACS2 (v2.1.2)<br>deepTools (v3.1.2)<br>Homer (v4.1)<br>STAR (v2.7.3)<br>DeSeq2 (v3.9)<br>DANPOS (v3.0)<br>BEDTools (v2.26.0)<br>AgriGO (v2.0)<br>PRISM (v8.0)<br>PyMOL (v2.3)<br>Code:<br><a href="https://github.com/sklasfeld/ChIP_Annotation">https://github.com/sklasfeld/ChIP_Annotation</a> |

For manuscripts utilizing custom algorithms or software that are central to the research but not yet described in published literature, software must be made available to editors/reviewers. We strongly encourage code deposition in a community repository (e.g. GitHub). See the Nature Research [guidelines for submitting code & software](#) for further information.

## Data

Policy information about [availability of data](#)

All manuscripts must include a [data availability statement](#). This statement should provide the following information, where applicable:

- Accession codes, unique identifiers, or web links for publicly available datasets
- A list of figures that have associated raw data
- A description of any restrictions on data availability

The authors declare that the data supporting the findings of this study are available within the paper and its supplementary information files. Source data are provided with this paper. The ChIP-seq, MNase-seq and RNA-seq datasets generated in this study are available at the GEO repository under accession number GSE141706.

## Field-specific reporting

Please select the one below that is the best fit for your research. If you are not sure, read the appropriate sections before making your selection.

- Life sciences  Behavioural & social sciences  Ecological, evolutionary & environmental sciences

For a reference copy of the document with all sections, see [nature.com/documents/nr-reporting-summary-flat.pdf](https://www.nature.com/documents/nr-reporting-summary-flat.pdf)

## Life sciences study design

All studies must disclose on these points even when the disclosure is negative.

|                 |                                                                                                                                                                                                                                                                              |
|-----------------|------------------------------------------------------------------------------------------------------------------------------------------------------------------------------------------------------------------------------------------------------------------------------|
| Sample size     | The sample size was chosen on the basis of prior studies that showed significant effects with similar samples sizes (for example see Winter et al., Developmental Cell 2011, Xiao et al., Nature Genetics 2017 and Yamaguchi N. et al., Science 2015, Chung et al., NC 2020) |
| Data exclusions | No data was excluded from the analysis                                                                                                                                                                                                                                       |
| Replication     | All attempts at replication were successful                                                                                                                                                                                                                                  |
| Randomization   | Sample allocation into groups was random                                                                                                                                                                                                                                     |
| Blinding        | The investigators were not blinded                                                                                                                                                                                                                                           |

## Reporting for specific materials, systems and methods

We require information from authors about some types of materials, experimental systems and methods used in many studies. Here, indicate whether each material, system or method listed is relevant to your study. If you are not sure if a list item applies to your research, read the appropriate section before selecting a response.

### Materials & experimental systems

| n/a                                 | Involvement in the study                             |
|-------------------------------------|------------------------------------------------------|
| <input type="checkbox"/>            | <input checked="" type="checkbox"/> Antibodies       |
| <input checked="" type="checkbox"/> | <input type="checkbox"/> Eukaryotic cell lines       |
| <input checked="" type="checkbox"/> | <input type="checkbox"/> Palaeontology               |
| <input checked="" type="checkbox"/> | <input type="checkbox"/> Animals and other organisms |
| <input checked="" type="checkbox"/> | <input type="checkbox"/> Human research participants |
| <input checked="" type="checkbox"/> | <input type="checkbox"/> Clinical data               |

### Methods

| n/a                                 | Involvement in the study                        |
|-------------------------------------|-------------------------------------------------|
| <input type="checkbox"/>            | <input checked="" type="checkbox"/> ChIP-seq    |
| <input checked="" type="checkbox"/> | <input type="checkbox"/> Flow cytometry         |
| <input checked="" type="checkbox"/> | <input type="checkbox"/> MRI-based neuroimaging |

## Antibodies

|                 |                                                                                                                                                                                                                                                                                                                   |
|-----------------|-------------------------------------------------------------------------------------------------------------------------------------------------------------------------------------------------------------------------------------------------------------------------------------------------------------------|
| Antibodies used | rabbit polyclonal anti-LFY antibody (1:100 dilution)<br>Mouse IgG2bk Anti-HA antibody (Abcam, 46540; 1:300 dilution)<br>Mouse anti-HA antibody (ROCHE, 12CA5; 1:300 dilution)<br>Rabbit Anti-Histone H3 antibody (Abcam, 18521; 1:300 dilution)<br>Rabbit Anti-Histone H1 antibody (Abcam, 61177; 1:300 dilution) |
| Validation      | The commercial antibodies were validated by the suppliers. The LFY antibody was validated in Wagner et al. Science 1999                                                                                                                                                                                           |

## ChIP-seq

## Data deposition

Confirm that both raw and final processed data have been deposited in a public database such as [GEO](#).

Confirm that you have deposited or provided access to graph files (e.g. BED files) for the called peaks.

## Data access links

May remain private before publication.

For "Initial submission" or "Revised version" documents, provide reviewer access links. For your "Final submission" document, provide a link to the deposited data.

## Files in database submission

Deposition at GEO: GSE141706  
ChIPseq  
LFY ChIP mock treated: 3 replicates  
LFY ChIP dex treated: 3 replicates  
LFY ChIP input 3 replicates

RNA-seq  
1hr Mock treated: 2 replicates  
1hr Dex treated: 2 replicates  
6hr Mock treated: 2 replicates  
6hr Dex treated: 2 replicates  
24hr Mock treated: 2 replicates  
24hr Dex treated: 2 replicates

MNase-seq  
Low digestion LFY-GR mock treated: 2 replicates  
Low digestion LFY\_GR dex treated: 2 replicates  
High digestion LFY-GR mock treated: 2 replicates  
High digestion LFY-GR dex treated: 2 replicates

Genome browser session  
(e.g. [UCSC](#))

Provide a link to an anonymized genome browser session for "Initial submission" and "Revised version" documents only, to enable peer review. Write "no longer applicable" for "Final submission" documents.

## Methodology

## Replicates

Replicates agreed well, data provided in the supplement

## Sequencing depth

| Experiment         | Total number of reads | Reads with MAPQ>=30 | Length of reads | Paired or single end |
|--------------------|-----------------------|---------------------|-----------------|----------------------|
| Input Rep1         | 26,761,827            | 6,301,384           | 75              | SINGLE               |
| Input Rep2         | 20,718,056            | 5,069,260           | 75              | SINGLE               |
| Input Rep3         | 24,978,497            | 5,976,131           | 75              | SINGLE               |
| mock LFY ChIP Rep1 | 11,723,349            | 15,855,482          | 75              | SINGLE               |
| mock LFY ChIP Rep2 | 10,859,703            | 11,254,214          | 75              | SINGLE               |
| mock LFY ChIP Rep3 | 12,077,242            | 13,627,606          | 75              | SINGLE               |
| dex LFY ChIP Rep1  | 14,275,060            | 3,592,525           | 75              | SINGLE               |
| dex LFY ChIP Rep2  | 13,160,663            | 5,057,687           | 75              | SINGLE               |
| dex LFY ChIP Rep3  | 13,724,721            | 4,987,344           | 75              | SINGLE               |

## Antibodies

Antibody was validated Wagner et al. Science 1999 and by control ChIP reactions using plants lacking the antigen. data presented in the Supplement

## Peak calling parameters

Peak calling is described in the Methods

## Data quality

Peak attributes are described in the Methods

## Software

Software used is described in the Methods
